# Supplementary material for: Diagnostic accuracy of diffusion weighted imaging for differentiation of supratentorial pilocytic astrocytoma and pleomorphic xanthoastrocytoma
Source: Springer Nature journal article supplement (doi:10.1007/s00234-018-2036-y), 2018-05-24
Supplement: MOESM1 [file 15789808]

| Criterion | Sensitivity | 95% CI       | Specificity | 95% CI       | +LR  | -LR  | +PV   | 95% CI       | -PV   | 95% CI      |
|-----------|-------------|--------------|-------------|--------------|------|------|-------|--------------|-------|-------------|
| ≥547      | 100.00      | 79.4 - 100.0 | 0.00        | 0.0 - 36.9   | 1.00 |      | 66.7  | 44.7 - 84.4  |       |             |
| >547      | 100.00      | 79.4 - 100.0 | 12.50       | 0.3 - 52.7   | 1.14 | 0.00 | 69.6  | 47.1 - 86.8  | 100.0 | 2.5 - 100.0 |
| >967.37   | 93.75       | 69.8 - 99.8  | 12.50       | 0.3 - 52.7   | 1.07 | 0.50 | 68.2  | 45.1 - 86.1  | 50.0  | 1.3 - 98.7  |
| >1018     | 93.75       | 69.8 - 99.8  | 37.50       | 8.5 - 75.5   | 1.50 | 0.17 | 75.0  | 50.9 - 91.3  | 75.0  | 19.4 - 99.4 |
| >1028.6   | 87.50       | 61.7 - 98.4  | 37.50       | 8.5 - 75.5   | 1.40 | 0.33 | 73.7  | 48.8 - 90.9  | 60.0  | 14.7 - 94.7 |
| >1032.33  | 87.50       | 61.7 - 98.4  | 50.00       | 15.7 - 84.3  | 1.75 | 0.25 | 77.8  | 52.4 - 93.6  | 66.7  | 22.3 - 95.7 |
| >1059.25  | 75.00       | 47.6 - 92.7  | 50.00       | 15.7 - 84.3  | 1.50 | 0.50 | 75.0  | 47.6 - 92.7  | 50.0  | 15.7 - 84.3 |
| >1063.5   | 75.00       | 47.6 - 92.7  | 87.50       | 47.3 - 99.7  | 6.00 | 0.29 | 92.3  | 64.0 - 99.8  | 63.6  | 30.8 - 89.1 |
| >1116     | 56.25       | 29.9 - 80.2  | 87.50       | 47.3 - 99.7  | 4.50 | 0.50 | 90.0  | 55.5 - 99.7  | 50.0  | 23.0 - 77.0 |
| >1119.13  | 56.25       | 29.9 - 80.2  | 100.00      | 63.1 - 100.0 |      | 0.44 | 100.0 | 66.4 - 100.0 | 53.3  | 26.6 - 78.7 |
| >1794.38  | 0.00        | 0.0 - 20.6   | 100.00      | 63.1 - 100.0 |      | 1.00 |       |              | 33.3  | 15.6 - 55.3 |

Supplementary Figure 1. The decision plot of ROC analysis of ADC<sub>min</sub> values in differentiating supratentorial PA and PXA.

| Criterion | Sensitivity | 95% CI       | Specificity | 95% CI       | +LR  | -LR   | +PV   | 95% CI       | -PV   | 95% CI       |
|-----------|-------------|--------------|-------------|--------------|------|-------|-------|--------------|-------|--------------|
| ≥697.91   | 100.00      | 79.4 - 100.0 | 0.00        | 0.0 - 36.9   | 1.00 |       | 66.7  | 44.7 - 84.4  |       |              |
| >1096.85  | 100.00      | 79.4 - 100.0 | 62.50       | 24.5 - 91.5  | 2.67 | 0.00  | 84.2  | 60.4 - 96.6  | 100.0 | 47.8 - 100.0 |
| >1141.31  | 93.75       | 69.8 - 99.8  | 62.50       | 24.5 - 91.5  | 2.50 | 0.10  | 83.3  | 58.6 - 96.4  | 83.3  | 35.9 - 99.6  |
| >1189.8   | 93.75       | 69.8 - 99.8  | 100.00      | 63.1 - 100.0 |      | 0.063 | 100.0 | 78.2 - 100.0 | 88.9  | 51.8 - 99.7  |
| >1828.62  | 0.00        | 0.0 - 20.6   | 100.00      | 63.1 - 100.0 |      | 1.00  |       |              | 33.3  | 15.6 - 55.3  |

Supplementary Figure 2. The decision plot of ROC analysis of ADC<sub>mean</sub> values in differentiating supratentorial PA and PXA.

| Criterion | Sensitivity | 95% CI       | Specificity | 95% CI       | +LR  | -LR  | +PV   | 95% CI       | -PV   | 95% CI      |
|-----------|-------------|--------------|-------------|--------------|------|------|-------|--------------|-------|-------------|
| ≥547      | 100.00      | 59.0 - 100.0 | 0.00        | 0.0 - 36.9   | 1.00 |      | 46.7  | 21.3 - 73.4  |       |             |
| >547      | 100.00      | 59.0 - 100.0 | 12.50       | 0.3 - 52.7   | 1.14 | 0.00 | 50.0  | 23.0 - 77.0  | 100.0 | 2.5 - 100.0 |
| >967.37   | 85.71       | 42.1 - 99.6  | 12.50       | 0.3 - 52.7   | 0.98 | 1.14 | 46.2  | 19.2 - 74.9  | 50.0  | 1.3 - 98.7  |
| >1063.5   | 85.71       | 42.1 - 99.6  | 87.50       | 47.3 - 99.7  | 6.86 | 0.16 | 85.7  | 42.1 - 99.6  | 87.5  | 47.3 - 99.7 |
| >1116     | 57.14       | 18.4 - 90.1  | 87.50       | 47.3 - 99.7  | 4.57 | 0.49 | 80.0  | 28.4 - 99.5  | 70.0  | 34.8 - 93.3 |
| >1119.13  | 57.14       | 18.4 - 90.1  | 100.00      | 63.1 - 100.0 |      | 0.43 | 100.0 | 39.8 - 100.0 | 72.7  | 39.0 - 94.0 |
| >1794.38  | 0.00        | 0.0 - 41.0   | 100.00      | 63.1 - 100.0 |      | 1.00 |       |              | 53.3  | 26.6 - 78.7 |

Supplementary Figure 3. The decision plot of ROC analysis of ADC<sub>min</sub> values in differentiating lobar PA and PXA.

| Criterion | Sensitivity | 95% CI       | Specificity | 95% CI       | +LR  | -LR  | +PV   | 95% CI       | -PV   | 95% CI       |
|-----------|-------------|--------------|-------------|--------------|------|------|-------|--------------|-------|--------------|
| ≥697.91   | 100.00      | 59.0 - 100.0 | 0.00        | 0.0 - 36.9   | 1.00 |      | 46.7  | 21.3 - 73.4  |       |              |
| >1096.85  | 100.00      | 59.0 - 100.0 | 62.50       | 24.5 - 91.5  | 2.67 | 0.00 | 70.0  | 34.8 - 93.3  | 100.0 | 47.8 - 100.0 |
| >1141.31  | 85.71       | 42.1 - 99.6  | 62.50       | 24.5 - 91.5  | 2.29 | 0.23 | 66.7  | 29.9 - 92.5  | 83.3  | 35.9 - 99.6  |
| >1189.8   | 85.71       | 42.1 - 99.6  | 100.00      | 63.1 - 100.0 |      | 0.14 | 100.0 | 54.1 - 100.0 | 88.9  | 51.8 - 99.7  |
| >1828.62  | 0.00        | 0.0 - 41.0   | 100.00      | 63.1 - 100.0 |      | 1.00 |       |              | 53.3  | 26.6 - 78.7  |

Supplementary Figure 4. The decision plot of ROC analysis of ADC<sub>mean</sub> values in differentiating lobar PA and PXA.
